# Supplementary material
Source: PubMed Central journal article supplement (PMC6461956)

# Supple Figure S1

**a**

| P value                       | Q value                       | Pathway                                          | Source              |
|-------------------------------|-------------------------------|--------------------------------------------------|---------------------|
| <b>6.76 x 10<sup>-8</sup></b> | <b>2.13 x 10<sup>-4</sup></b> | <b>EGFR1</b>                                     | <b>NetPath</b>      |
| 1.05 x 10 <sup>-5</sup>       | 1.62 x 10 <sup>-3</sup>       | FoxO signaling pathway - Homo sapiens            | KEGG                |
| 1.54 x 10 <sup>-6</sup>       | 1.62 x 10 <sup>-3</sup>       | Amoebiasis - Homo sapiens                        | KEGG                |
| 3.11 x 10 <sup>-6</sup>       | 2.45 x 10 <sup>-3</sup>       | Interleukin-6 signaling                          | Reactome            |
| 6.73 x 10 <sup>-6</sup>       | 3.94 x 10 <sup>-3</sup>       | Hemostasis                                       | Reactome            |
| 7.51 x 10 <sup>-6</sup>       | 3.94 x 10 <sup>-3</sup>       | Leptin                                           | NetPath             |
| 1.93 x 10 <sup>-5</sup>       | 8.69 x 10 <sup>-3</sup>       | Extracellular matrix organization                | Reactome            |
| 2.41 x 10 <sup>-5</sup>       | 9.50 x 10 <sup>-3</sup>       | p53 signaling pathway - Homo sapiens             | KEGG                |
| 4.55 x 10 <sup>-5</sup>       | 1.57 x 10 <sup>-2</sup>       | Leptin signaling pathway                         | Wikipathways        |
| <b>5.00 x 10<sup>-5</sup></b> | <b>1.57 x 10<sup>-2</sup></b> | <b>MAPK1 (ERK2) activation</b>                   | <b>Reactome</b>     |
| 6.00 x 10 <sup>-5</sup>       | 1.72 x 10 <sup>-2</sup>       | Thyroid hormone signaling pathway - Homo sapiens | KEGG                |
| 7.23 x 10 <sup>-5</sup>       | 1.87 x 10 <sup>-2</sup>       | ECM-receptor interaction - Homo sapiens          | KEGG                |
| 9.32 x 10 <sup>-5</sup>       | 1.87 x 10 <sup>-2</sup>       | Platelet activation - Homo sapiens               | KEGG                |
| 9.60 x 10 <sup>-5</sup>       | 1.87 x 10 <sup>-2</sup>       | Retinoblastoma (RB) in Cancer                    | Wikipathways        |
| 1.81 x 10 <sup>-4</sup>       | 1.87 x 10 <sup>-2</sup>       | Alpha6Beta4Integrin                              | NetPath             |
| 1.81 x 10 <sup>-4</sup>       | 1.87 x 10 <sup>-2</sup>       | Ectoderm Differentiation                         | Wikipathways        |
| <b>1.83 x 10<sup>-4</sup></b> | <b>1.87 x 10<sup>-2</sup></b> | <b>EGF-EGFR Signaling Pathway</b>                | <b>Wikipathways</b> |
| 2.25 x 10 <sup>-4</sup>       | 1.87 x 10 <sup>-2</sup>       | Toxoplasmosis                                    | Wikipathways        |
| 2.49 x 10 <sup>-4</sup>       | 1.87 x 10 <sup>-2</sup>       | Polycystic Kidney Disease Pathway                | Wikipathways        |

**b**

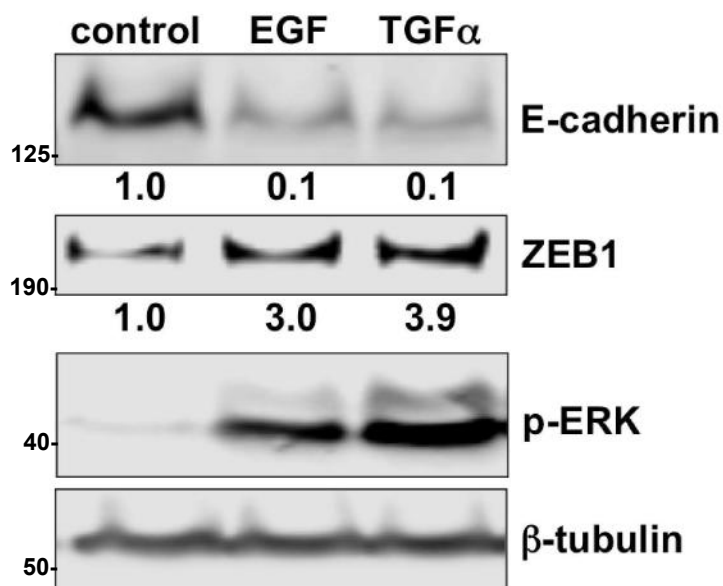

Supplement: 41418_2018_175_MOESM2_ESM.pdf [file 41418_2018_175_MOESM2_ESM.pdf]
