# Supplementary material
Source: PubMed Central journal article supplement (PMC6461956)

# Supple Figure S5

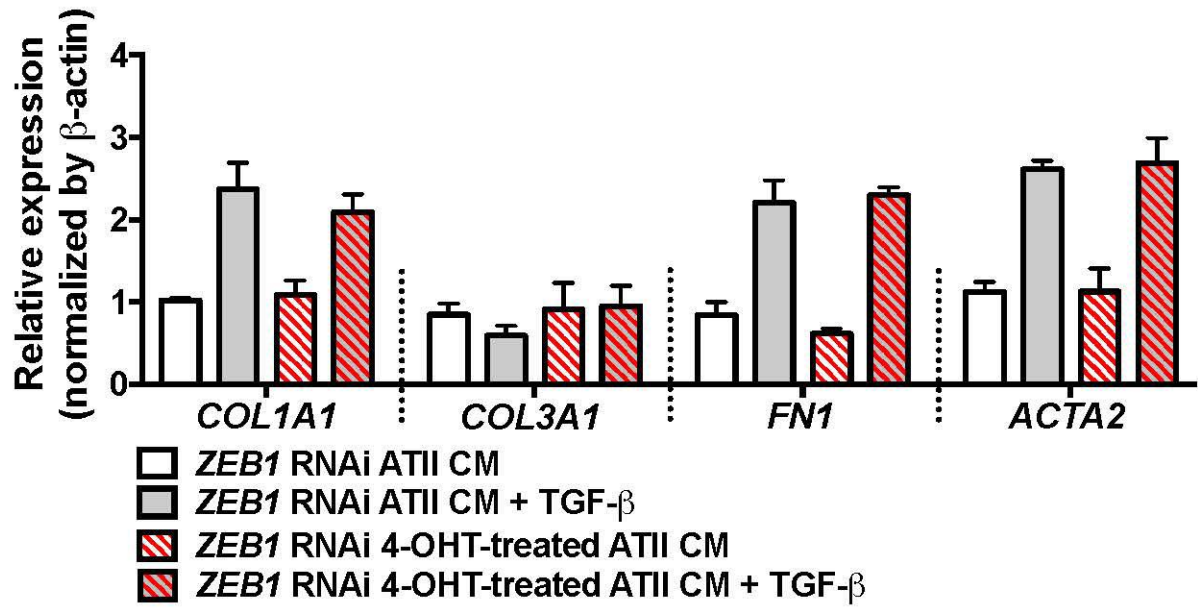

Supplement: 41418_2018_175_MOESM6_ESM.pdf [file 41418_2018_175_MOESM6_ESM.pdf]
