# Supplementary material
Source: PubMed Central journal article supplement (PMC6461956)

# Supple Figure S6

**a**

*PLAT* promoter for cloning (-689 to -1 upstream of TSS/bp)  
[ZEB1 binding site E box (5-CANNTG-3)]

5'TCTATTTCCAGGGGCATTTTACAAGCAAATACTGAAAGGCTTCGGTGGGCTTAAGGGCTGATGGCTTTG  
ATCGAATTTCAGGCATGTTGGCCCAAGGCCCTGTGTATATTCCCTGGGCCCACTCAAGGGGATGCTGG  
AGCCGGAAAGTCCCGGAGGGCCACCTACTGCAGCCCTGCACTTTACAAGAAGAGAAAGATTCTCCCTA  
AAATTACAGAACAGGGCCAAAGATGCCTACCGGAGCAAACCCCATGGGGGCACCTCCTACCG **CAGGTG**  
AGCCCAAGGCTGGTCCTGCCTTCTCAGTGGCTACCCCCCTGAGCTCCCGCCACCACACAAAGTGTTC  
ATCCTTGTGCATCCTCCAGTCCTTTTAACCTCTCATGTCCTGAGAGGCCAGAGCTACAGCCACAGATTCC  
AGAAGACACCCCACTCCAGCCCCAACCTGCTGCCTTTAGAATTATAAACACTTCTTGTGCATCACAGGGT  
CCTGAAAGTCCCTTTTAAGCCTGGGACACTAGGACTCTAAAGGAAGATGATTCTTAAGGTCCCATCCAC  
TTCCAAATTCCTGCGATTCAATGACATCACGGCTGTGAATAATCAGCCTGGCCCGAAGCCAGGATGGGCT  
GTGCTGCTTCCACCGTGAACCTTCTCCCCCTGCTTTATAAAAACAGGCCTGCCTCAGCTCCCTC3'

**b**

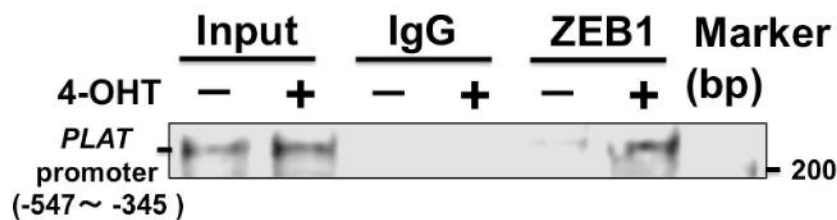

**c**

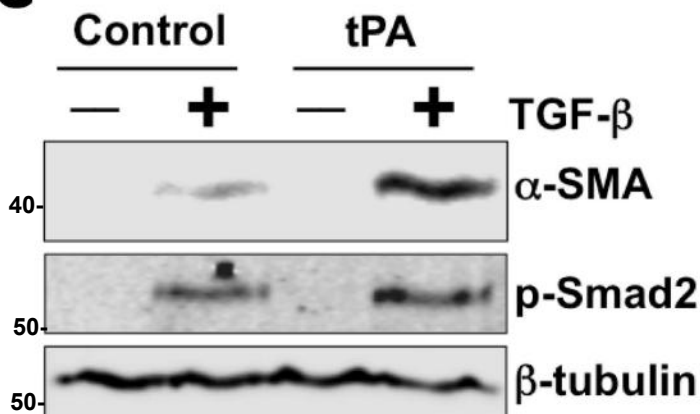

**d**

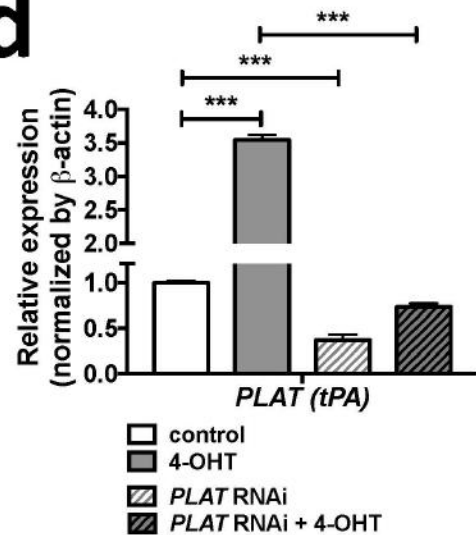

Supplement: 41418_2018_175_MOESM7_ESM.pdf [file 41418_2018_175_MOESM7_ESM.pdf]
