# Supplementary material
Source: PubMed Central journal article supplement (PMC6461956)
Supplement: 41418_2018_175_MOESM9_ESM.pdf [file 41418_2018_175_MOESM9_ESM.pdf]

# Supplementary Table S1

| Secretome analysis |                   |                                                                                                            |            |            |            |              |            |            |            |            |                  |              | LGEA analysis |         |             |
|--------------------|-------------------|------------------------------------------------------------------------------------------------------------|------------|------------|------------|--------------|------------|------------|------------|------------|------------------|--------------|---------------|---------|-------------|
| protein.Entry      | protein.Accession | protein.Description                                                                                        | Control 1  | Control 2  | Control 3  | Mean Control | 4OHT_1     | 4OHT_2     | 4OHT_3     | Mean 4OHT  | Present_NumFiles | 4OHT/Control | t test        | P value | fold change |
| sp                 | P00750            | TPA_HUMAN Tissue-type plasminogen activator OS=Homo sapiens GN=PLAT PE=1 SV=1                              | 0.03805945 | 0.01625878 | 1.42580102 | 0.493373083  | 5.43590936 | 3.76467321 | 3.91557126 | 4.37205128 | 4                | 8.86155209   | 0.0054235     | 0.0029  | 62.186      |
| sp                 | O43665            | RGS10_HUMAN Regulator of G-protein signaling 10 OS=Homo sapiens GN=RGS10 PE=1 SV=2                         | 0.03805945 | 0.01625878 | 0.07417637 | 0.042831532  | 0.99216271 | 0.780106   | 0.60354859 | 0.7919391  | 3                | 18.48962817  | 0.0027397     | 0.0173  | 31.993      |
| sp                 | Q9UBP4            | DKK3_HUMAN Dickkopf-related protein 3 OS=Homo sapiens GN=DKK3 PE=1 SV=2                                    | 5.93056295 | 5.83114799 | 4.56300733 | 5.441572754  | 10.0672589 | 9.12225748 | 6.76727499 | 8.65226378 | 6                | 1.590029974  | 0.0405159     | 0.0016  | 22.862      |
| sp                 | P09382            | LEG1_HUMAN Galectin-1 OS=Homo sapiens GN=LGALS1 PE=1 SV=2                                                  | 26.24369   | 24.4859987 | 25.7932936 | 25.50766077  | 32.8702499 | 34.1803729 | 33.0724352 | 33.3743527 | 6                | 1.30840507   | 0.0002942     | 0.0078  | 21.273      |
| sp                 | P49006            | MRP_HUMAN MARCKS-related protein OS=Homo sapiens GN=MARCKSL1 PE=1 SV=2                                     | 0.03805945 | 0.01625878 | 0.07417637 | 0.042831532  | 1.22915429 | 0.81883881 | 1.03388924 | 1.02729411 | 3                | 23.98452876  | 0.0011912     | 0.0448  | 8.948       |
| sp                 | Q9BUF5            | TBB6_HUMAN Tubulin beta-6 chain OS=Homo sapiens GN=TUBB6 PE=1 SV=1                                         | 1.59108512 | 1.6288924  | 1.70757031 | 1.642515942  | 2.42474405 | 1.99892431 | 1.96350613 | 2.12905816 | 6                | 1.296217653  | 0.0329479     | 0.0085  | 7.791       |
| sp                 | Q01813            | PFKAP_HUMAN ATP-dependent 6-phosphofructokinase, platelet type OS=Homo sapiens GN=PFKP PE=1 SV=2           | 1.41330745 | 1.34007068 | 0.99123851 | 1.248205545  | 2.99812274 | 2.50893872 | 2.45329649 | 2.65345265 | 6                | 2.12581386   | 0.0029099     | 0.0103  | 4.928       |
| sp                 | O00154            | BACH_HUMAN Cytosolic acyl coenzyme A thioester hydrolase OS=Homo sapiens GN=ACOT7 PE=1 SV=3                | 5.52472907 | 4.71961366 | 5.08920541 | 5.111182716  | 7.68256975 | 8.53283108 | 7.77277898 | 7.99605994 | 6                | 1.564424592  | 0.0012627     | 0.0157  | 4.724       |
| sp                 | Q16643            | DREB_HUMAN Drebrin OS=Homo sapiens GN=DBN1 PE=1 SV=4                                                       | 1.28240299 | 1.27421348 | 0.07417637 | 0.876930945  | 2.36175646 | 2.03966836 | 1.9269384  | 2.10945441 | 5                | 2.405496598  | 0.0432139     | 0.0027  | 4.643       |
| sp                 | P08727            | K1C19_HUMAN Keratin, type I cytoskeletal 19 OS=Homo sapiens GN=KRT19 PE=1 SV=4                             | 16.5180996 | 12.9025304 | 16.2798462 | 15.23349207  | 23.4078944 | 23.8995049 | 26.3436831 | 24.5503608 | 6                | 1.611604266  | 0.003245      | 0.0206  | 4.214       |
| sp                 | O95865            | DDAH2_HUMAN N(G)_N(G)-dimethylarginine dimethylaminohydrolase 2 OS=Homo sapiens GN=DDAH2 PE=1 SV=1         | 0.03805945 | 0.01625878 | 0.07417637 | 0.234648615  | 1.22556913 | 3.90442274 | 4.6763973  | 3.26879639 | 4                | 13.93060167  | 0.0459206     | 0.0237  | 3.299       |
| sp                 | P08729            | K2C7_HUMAN Keratin, type II cytoskeletal 7 OS=Homo sapiens GN=KRT7 PE=1 SV=5                               | 4.32725875 | 4.56625134 | 3.79641725 | 4.229975778  | 7.48748748 | 8.05830553 | 8.50840587 | 8.01806629 | 6                | 1.8955348    | 0.0005285     | 0.0013  | 3.216       |
| sp                 | Q9NVA2            | SEPT1_HUMAN Septin-11 OS=Homo sapiens GN=SEPT11 PE=1 SV=3                                                  | 1.57415868 | 1.13117274 | 0.97297195 | 1.226101122  | 2.2307126  | 3.16447689 | 2.8112982  | 2.7354959  | 6                | 2.231052436  | 0.0098376     | 0.004   | 2.985       |
| sp                 | Q16555            | DPYL2_HUMAN Dihydropyrimidinase-related protein 2 OS=Homo sapiens GN=DPYSL2 PE=1 SV=1                      | 2.68078712 | 2.34254329 | 2.10650798 | 2.376612799  | 3.84755891 | 3.69629067 | 4.17248673 | 3.90544543 | 6                | 1.643282169  | 0.0021756     | 0.009   | 2.707       |
| sp                 | Q96HC4            | PDLIS_HUMAN PDZ and LIM domain protein 5 OS=Homo sapiens GN=PDLIM5 PE=1 SV=5                               | 0.03805945 | 0.01625878 | 0.07417637 | 0.042831532  | 1.42312393 | 1.51615911 | 1.08566335 | 1.34164879 | 3                | 31.32385725  | 0.000596      | 0.0108  | 2.637       |
| sp                 | P14618            | KPYM_HUMAN Pyruvate kinase PKM OS=Homo sapiens GN=PKM PE=1 SV=4                                            | 34.1364177 | 34.2956157 | 41.1210583 | 36.51769721  | 44.7813329 | 41.5010682 | 46.4058265 | 44.2294092 | 6                | 1.211177391  | 0.046935      | 0.018   | 2.134       |
| sp                 | Q15942            | ZYX_HUMAN Zyxin OS=Homo sapiens GN=ZYX PE=1 SV=1                                                           | 4.62041663 | 5.84959897 | 4.55543831 | 5.008484634  | 7.11327073 | 6.31643212 | 7.42846302 | 6.95272195 | 6                | 1.388188736  | 0.0221407     | 0.0048  | 2.110       |
| sp                 | P33316            | DUT_HUMAN Deoxyuridine 5'-triphosphate nucleotidohydrolase, mitochondrial OS=Homo sapiens GN=DUT PE=1 SV=4 | 0.66413732 | 0.01625878 | 1.08337868 | 0.587924926  | 3.09795096 | 1.77269097 | 2.29507769 | 2.38857321 | 5                | 4.062718048  | 0.0219007     | 0.0262  | 2.049       |
| sp                 | Q9H299            | SH3L3_HUMAN SH3 domain-binding glutamic acid-rich-like protein 3 OS=Homo sapiens GN=SH3BGL3 PE=1 SV=1      | 10.6936023 | 11.6126062 | 10.6132761 | 10.97316155  | 13.5005461 | 13.5527846 | 12.8667001 | 13.306677  | 6                | 1.212656616  | 0.0038884     | 0.0329  | 1.971       |
| sp                 | Q9HA64            | KT3K_HUMAN Ketosamine-3-kinase OS=Homo sapiens GN=FN3KRP PE=1 SV=2                                         | 0.03805945 | 0.01625878 | 0.07417637 | 0.042831532  | 0.8801573  | 1.3146447  | 1.45076137 | 1.21518779 | 3                | 28.3713361   | 0.0024689     | 0.011   | 1.845       |
| sp                 | P35237            | SPB6_HUMAN Serpin B6 OS=Homo sapiens GN=SERPINB6 PE=1 SV=3                                                 | 1.84898793 | 2.04193852 | 1.8771163  | 1.922680918  | 2.79704459 | 2.88861106 | 3.64011849 | 3.10859138 | 6                | 1.616800455  | 0.0123326     | 0.0399  | 1.781       |
| sp                 | P67936            | TPM4_HUMAN Tropomyosin alpha-4 chain OS=Homo sapiens GN=TPM4 PE=1 SV=3                                     | 6.7261055  | 6.07247215 | 7.76056393 | 6.853047193  | 9.1039629  | 8.09742761 | 8.41492282 | 8.53877111 | 6                | 1.245981659  | 0.0425782     | 0.0447  | 1.718       |
| sp                 | P15311            | EZR1_HUMAN Ezrin OS=Homo sapiens GN=EZR PE=1 SV=4                                                          | 24.1979949 | 22.4183019 | 21.3273715 | 22.64788942  | 26.6794785 | 30.7285466 | 30.7930708 | 29.4003653 | 6                | 1.298150337  | 0.0133946     | 0.0204  | 1.679       |
| sp                 | O14907            | TX1B3_HUMAN Tax1-binding protein 3 OS=Homo sapiens GN=TX1BP3 PE=1 SV=2                                     | 0.03805945 | 0.01625878 | 0.07417637 | 0.042831532  | 1.88357001 | 4.36947595 | 4.53555723 | 3.59620106 | 3                | 83.96153243  | 0.0143496     | 0.0023  | 1.585       |
| sp                 | O43707            | ACTN4_HUMAN Alpha-actinin-4 OS=Homo sapiens GN=ACTN4 PE=1 SV=2                                             | 24.6135439 | 25.0097507 | 25.5202034 | 25.04783267  | 32.0447354 | 30.9006059 | 34.5628056 | 32.5027156 | 6                | 1.297625869  | 0.0025856     | 0.0246  | 1.507       |
